# Supplementary material for: Tom70-regulated mitochondrial biogenesis via TFAM improves hypoxia-induced dysfunction of pulmonary vascular endothelial cells and alleviates hypoxic pulmonary hypertension
Source: Springer Nature journal article supplement (doi:10.1186/s12931-023-02631-y), 2023-12-13

**Fig. 1D**

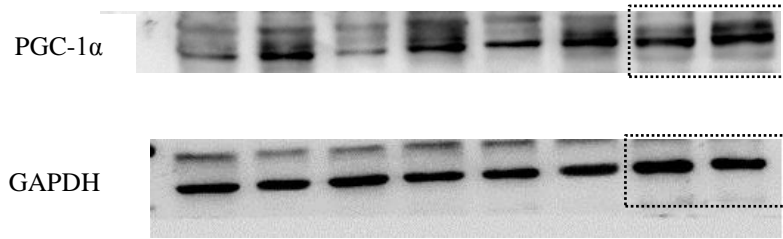

**Fig. 1E**

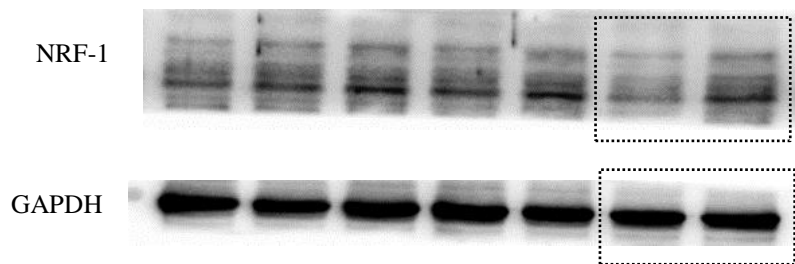

**Fig. 1F**

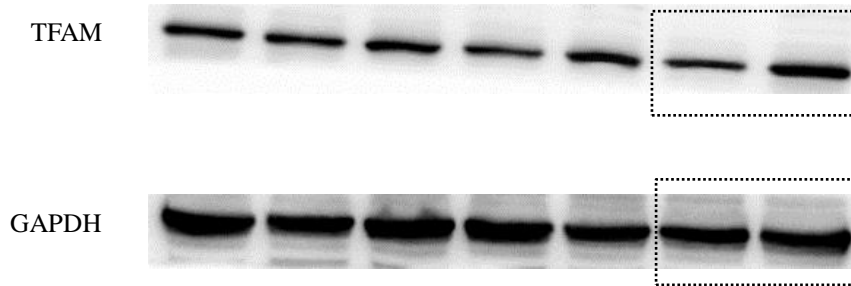

**Fig. 1G**

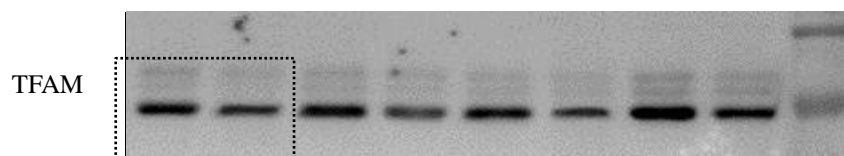

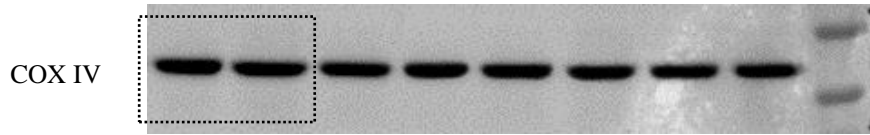

**Fig. 1H**

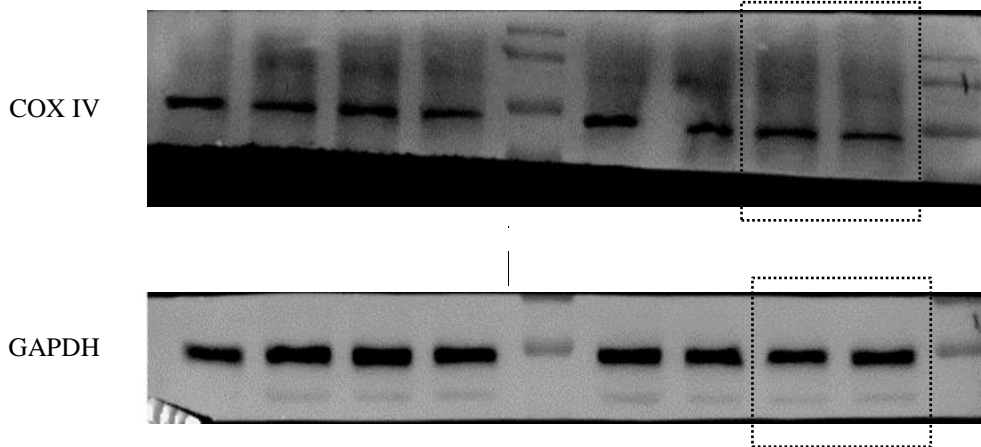

**Fig. 2A**

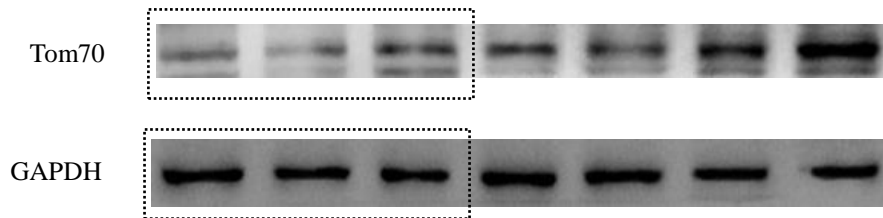

**Fig. 2D**

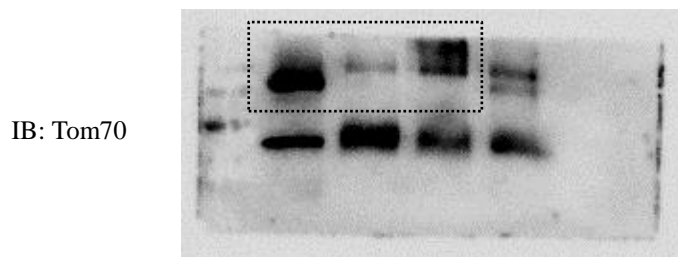

IB: TFAM

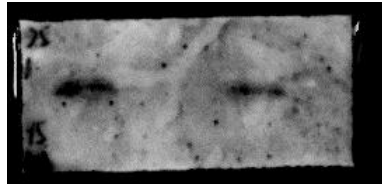

**Fig. 3A**

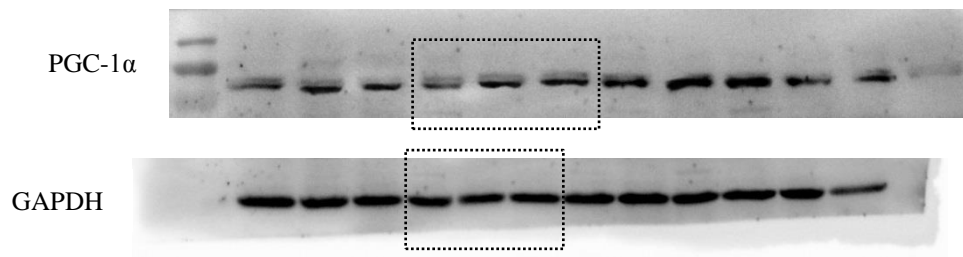

**Fig. 3B**

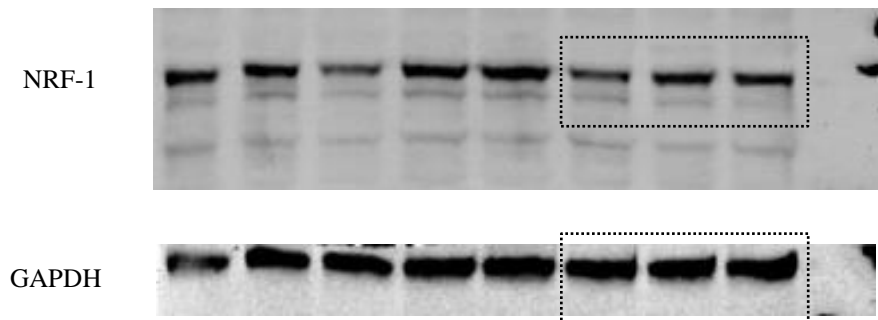

**Fig. 3C**

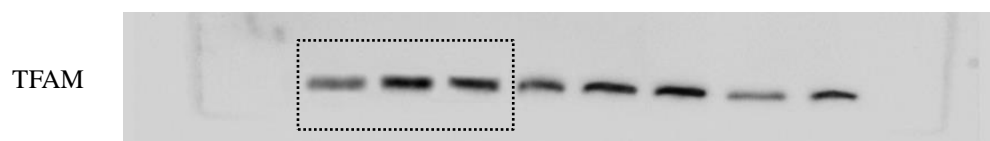

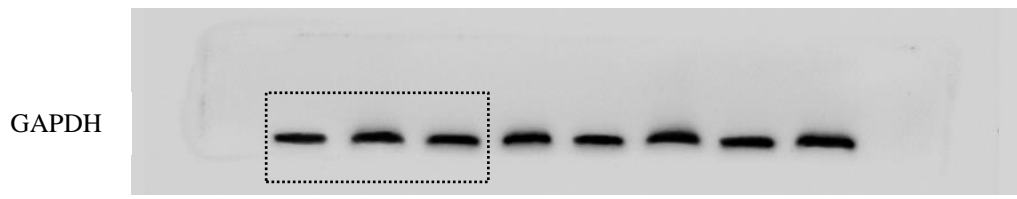

**Fig. 3D**

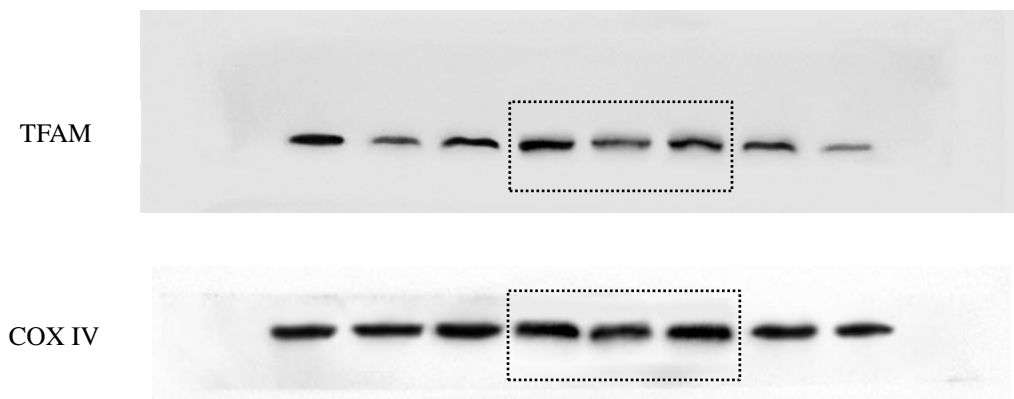

**Fig. 4D**

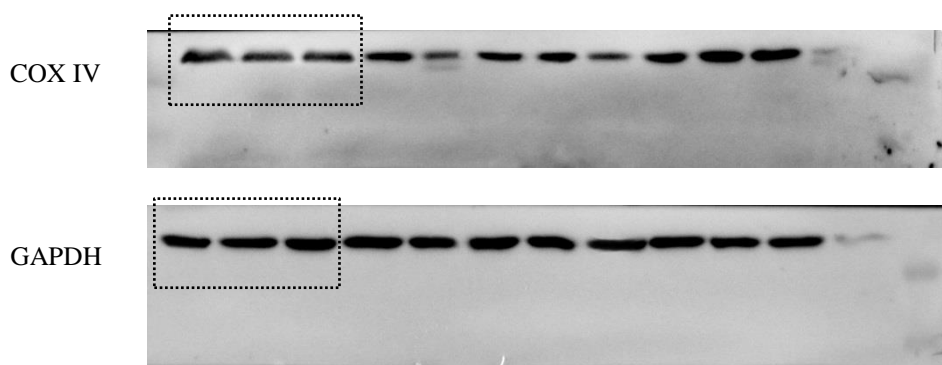

Supplement: MOESM1 [file 26524414]
